# Supplementary material for: Single step production of bioethanol from the seaweed Ulva rigida using sonication
Source: Royal Society of Chemistry journal article supplement (doi:10.1039/c4ra14880k), 2015-01-01
Supplement: c4ra14880k1.pdf [file c4ra14880k1.pdf]

## Supporting information

### **Single Step Production of Bioethanol from the Seaweed *Ulva rigida* using Sonication**

**Leor Korzen<sup>a</sup>, Indra Neel Pulidindi<sup>b</sup>, Alvaro Israel<sup>c</sup>, Avigdor Abelson<sup>a</sup> and Aharon Gedanken<sup>b</sup>**

<sup>a</sup> Department of Zoology, Tel Aviv University, Ramat Aviv 69978, Israel.

<sup>b</sup> Department of Chemistry, and Bar-Ilan University Center for Advanced Materials and Nanotechnology, Bar-Ilan University, Ramat-Gan 52900, Israel, and National Cheng Kung University, Department of Materials Science & Engineering, Tainan 70101, Taiwan

<sup>c</sup>Israel Oceanographic and Limnological Research Ltd. The National Institute of Oceanography, P.O. Box 3080, Tel Shikmona 31080, Haifa, Israel

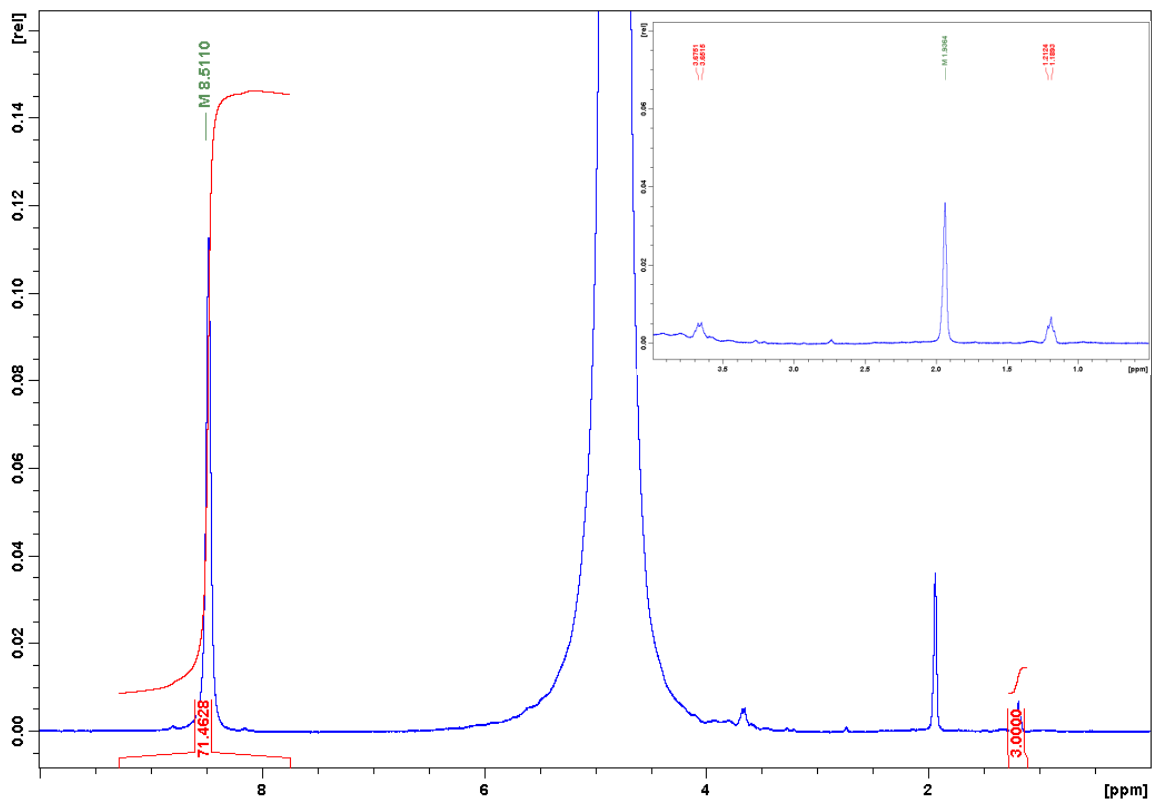

**Fig. S1.** <sup>1</sup>H NMR spectrum of the aliquot of sample collected from the fermentation (SHF) broth under incubation at 120 min

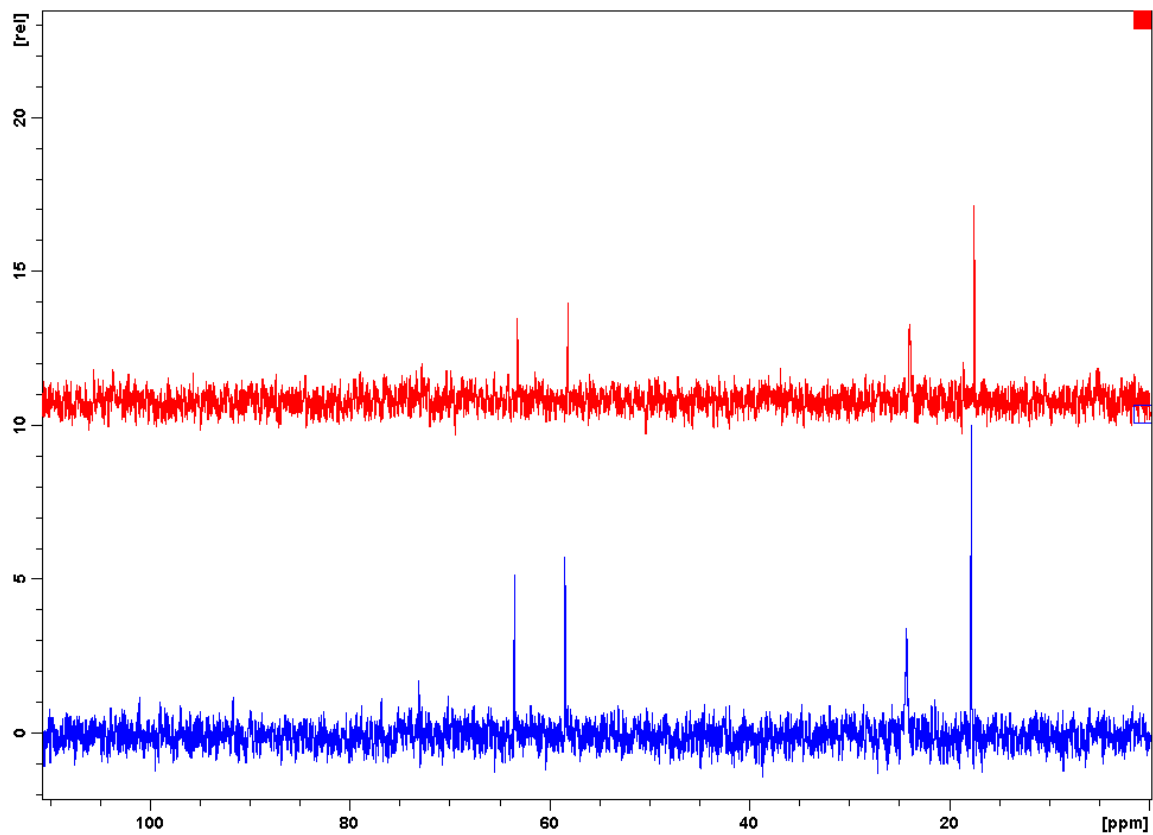

Fig. S2. <sup>13</sup>C NMR spectra of aliquots of samples from the fermentation broth at 180 min (a) under sonication and (b) under incubation at 37 °C [peaks at 63.4 and 72.8 indicate the formation of secondary metabolite, glycerol in addition to ethanol]
